# Supplementary material for: The fear of being laughed at (gelotophobia) in adults and children: testing trait-congruent false memories in the Deese–Roediger–McDermott paradigm
Source: publisher site journal article supplement (doi:10.1515/humor-2021-0035), 2023-03-09
Supplement: Supplementary file 1 [file j_humor-2021-0035_suppl.docx]

Online Supplement

Table A

Newly Created DRM Word List for the Lure “Laughter”

| Position | German | English | Frequency |
| --- | --- | --- | --- |
| 1 | Mund | Mouth | 56 |
| 2 | Freude | Joy | 55 |
| 3 | Weinen | Crying | 54 |
| 4 | Gesicht | Face | 46 |
| 5 | Fröhlich | Cheerful | 28 |
| 6 | Spaß | Fun | 25 |
| 7 | Glücklich | Happy | 23 |
| 8 | Freunde | Friends | 16 |
| 9 | Lustig | Funny | 16 |
| 10 | Witz | Joke | 15 |
| 11 | Zähne | Teeth | 14 |
| 12 | Grinsen | Grin | 12 |

*Note*. Data derived from 503 German-speaking participants that indicated their first association to the word ”Laughter“ within 30 seconds.

Table B

Neutral Distractor DRM Lists as Tentative English Translations (German Original in Brackets) Used in Adult Samples. Lures in Italics

| *Bread* (*Brot*) | *Car* (*Auto*)*** | *Hammer* (Hammer) | *Lion* (*Löwe*)*** | *Bed* (*Bett*)*** | *Summer* (*Sommer*) | *Telephone* (*Telefon*)*** | *Window* (*Fenster*) |
| --- | --- | --- | --- | --- | --- | --- | --- |
| Eat  (Essen) | Drive  (Fahren) | Nail  (Nagel) | Mane  (Mähne) | Pillow  (Kissen) | Sun  (Sonne) | Ring  (Klingeln) | Glass  (Glas) |
| Butter  (Butter) | Street  (Straße) | Saw  (Säge) | Tiger  (Tiger) | Blanket  (Decke) | Swimming pool  (Schwimmbad) | Speak  (Sprechen) | Clean  (Sauber) |
| Cheese  (Käse) | Tire  (Reifen) | Thumb  (Daumen) | Predator  (Raubtier) | Pajamas  (Schlafanzug) | Ice cream  (Eis) | Earpiece  (Hörer) | Light  (Licht) |
| Baker  (Käse) | Steering wheel  (Lenkrad) | Pliers  (Zange) | Africa  (Afrika) | Dream  (Traum) | Spring  (Frühling) | Call  (Anruf) | Frame  (Rahmen) |
| Knife  (Messer) | Bus  (Bus) | Noise  (Lärm) | Zoo  (Zoo) | Mattress  (Matratze) | Holiday  (Ferien) | Dial  (Wählen) | Curtain  (Vorhang) |
| Flour  (Mehl) | Driver’s license  (Führerschein) | Tool  (Werkzeug) | Roar  (Brüllen) | Night  (Nacht) | Winter  (Winter) | Mobile phone  (Handy) | Open  (Offen) |
| Breakfast  (Frühstück) | Petrol  (Benzin) | Wood  (Holz) | Paw  (Tatze) | Sleep  (Schlaf) | Sunscreen  (Sonnencreme) | Buttons  (Tasten) | Door  (Tür) |
| Jam  (Marmelade) | Porsche  (Porsche) | Wall  (Wand) | Meat  (Fleisch) | Tired  (Müde) | Beach  (Strand) | Cable  (Kabel) | View  (Sicht) |
| Chocolate spread  (Nutella) | Enginge  (Motor) | Work  (Arbeit) | King  (König) | Stuffed animal  (Kuscheltier) | Sandals  (Sandalen) | Wire  (Leitung) | Lookout  (Ausblick) |
| Wheats  (Körner) | Accident  (Unfall) | Hit  (Schlagen) | Dangerous  (Gefährlich) | Furniture  (Möbel) | Warm  (Warm) | Bill  (Rechnung) | Blinds  (Jalousien) |
| Slice  (Scheibe) | Exhaust  (Abgas) | Craftsman  (Handwerker) | Savannah  (Savanne) | Snore  (Schnarchen) | Sweat  (Schweiß) | Number  (Nummer) | Translucent  (Durchsichtig) |
| Cold cuts  (Wurst) | Horn  (Hupe) | Bang  (Klopfen) | Circus  (Zirkus) | Quiet  (Ruhe) | Vacation  (Urlaub) | Telekom  (Telekom) | Drape  (Gardine) |

*Note*. Original German words taken from Steffens and Mecklenbräuker (2007). *Lists used in replication study.

Table C

Neutral Distractor DRM Lists as Tentative English Translations (German Original in Brackets) Used in the Study of Children. Lures in Italics.

| *Rabbit* (*Hase*) | *Car* (*Auto*) | *Needle* (*Nadel*) | *Telephone* (*Telefon*) |
| --- | --- | --- | --- |
| Ears  (Ohren) | Drive  (Fahren) | Stitch  (Nähen) | Ring  (Klingeln) |
| Eastern  (Ostern) | Street  (Straße) | Filament  (Faden) | Speak  (Sprechen) |
| Carrot  (Möhre) | Tire  (Reifen) | Prick  (Piksen) | Earpiece  (Hörer) |
| Scamper  (Hoppeln) | Steering wheel  (Lenkrad) | Sharp  (Spitz) | Call  (Anrufen) |
| Hedgehog  (Igel) | Bus  (Bus) | Button  (Knopf) | Dial  (Wählen) |
| Bunny  (Kaninchen) | Driver’s license  (Führerschein) | Sting  (Stechen) | Mobile phone  (Handy) |
| Fox  (Fuchs) | Petrol  (Benzin) | Knitting  (Stricken) | Buttons  (Tasten) |
| Meat loaf  (Braten) | Porsche  (Porsche) | Yarn  (Garn) | Cable  (Kabel) |
| Field  (Feld) | Engine  (Motor) | Haystack  (Heuhaufen) | Wire  (Leitung) |
| Hunter  (Jäger) | Accident  (Unfall) | Syringe  (Spritze) | Bill  (Rechnung) |

*Note*. Original German words taken from Jammers (2007).
